## **Sedentary lifestyle, Physical Activity, and Gastrointestinal Diseases: Evidence from Mendelian Randomization Analysis**

Jie Chen<sup>1,2 #</sup>, Xixian Ruan<sup>2 #</sup>, Tian Fu<sup>2 #</sup>, Shiyuan Lu<sup>3</sup>, Dipender Gill<sup>4</sup>, Zixuan He<sup>5</sup>, Stephen Burgess<sup>6,7</sup>, Edward L Giovannucci<sup>8,9</sup>, Susanna C. Larsson<sup>10,11</sup>, Minzi Deng<sup>2\*</sup>, Shuai Yuan<sup>10\*</sup>, Xue Li<sup>1,12\*</sup>

### **Affiliations**

<sup>1</sup> School of Public Health and The Second Affiliated Hospital, Zhejiang University School of Medicine, Hangzhou, Zhejiang, China.

<sup>2</sup> Department of Gastroenterology, The Third Xiangya Hospital, Central South University, Changsha, China

<sup>3</sup> Department of Gastroenterology, The Second Affiliated Hospital of Zhejiang University School of Medicine, Hangzhou, China

<sup>4</sup> Department of Epidemiology and Biostatistics, School of Public Health, Imperial College London, London, United Kingdom

<sup>5</sup> Department of Gastroenterology, Changhai Hospital, Second Military Medical University/Naval Medical University, Shanghai, China

<sup>6</sup> MRC Biostatistics Unit, University of Cambridge, Cambridge, UK

<sup>7</sup> Department of Public Health and Primary Care, University of Cambridge, Cambridge, UK

<sup>8</sup> Department of Epidemiology, Harvard T H Chan School of Public Health, Boston, MA, USA.

<sup>9</sup> Department of Nutrition, Harvard T H Chan School of Public Health, Boston, MA, USA.

<sup>10</sup> Unit of Cardiovascular and Nutritional Epidemiology, Institute of Environmental Medicine, Karolinska Institutet, Stockholm, Sweden

<sup>11</sup> Unit of Medical Epidemiology, Department of Surgical Sciences, Uppsala University, Uppsala, Sweden.

<sup>12</sup> Centre for Global Health Research, Usher Institute, University of Edinburgh, Edinburgh, United Kingdom.

# Joint first authors

\* Joint corresponding authors

## Abstract

**Objectives:** The causal associations of physical activity and sedentary behavior with the risk of gastrointestinal disease is unclear. We performed a Mendelian randomization analysis to examine these associations.

**Methods:** Genetic instruments associated with leisure screen time (LST, an indicator of a sedentary lifestyle) and moderate-to-vigorous intensity physical activity (MVPA) at the genome-wide significance ( $P < 5 \times 10^{-8}$ ) level were selected from a genome-wide association study (N < 703,901). Summary statistics for gastrointestinal diseases were obtained from the UK Biobank study (N > 330,000), the FinnGen study (N > 220,000), and large consortia. Multivariable MR analyses were conducted for genetically determined LST with adjustment for MVPA and vice versa. We also performed multivariable MR with adjustment for genetically proxied smoking, body mass index (BMI), fasting insulin, and type 2 diabetes for both exposures.

**Results:** Genetically proxied longer LST was associated with increased risk of gastrointestinal reflux, gastric ulcer, duodenal ulcer, chronic gastritis, irritable bowel disease, diverticular disease, Crohn's disease, non-alcoholic fatty liver disease, alcoholic liver disease, cholecystitis, cholelithiasis, acute pancreatitis, chronic pancreatitis, and acute appendicitis. Most associations remained after adjustment for genetic liability to MVPA. Genetic liability to MVPA was associated with decreased risk of gastroesophageal reflux, gastric ulcer, chronic gastritis, irritable bowel syndrome, cholelithiasis, and acute pancreatitis. The associations attenuated albeit directionally remained after adjusting for genetically predicted LST. Multivariable MR analysis found that BMI and type 2 diabetes mediated the associations of LST and MVPA with several gastrointestinal diseases.

**Conclusion:** The study suggests that a sedentary lifestyle may play a causal role in the development of many gastrointestinal diseases.

**Keywords:** gastrointestinal diseases; leisure screen time; Mendelian randomization; physical activity; sedentary lifestyle

## Introduction

Insufficient physical activity affects approximately 27.5% of the global population, with a higher prevalence of 42.3% in high-income countries, significantly contributing to the burden of disease (1). Previous population-based observational studies found that high physical activity levels were associated with a low risk of many gastrointestinal diseases, including gastroesophageal reflux disease (2), esophageal cancer (3), colorectal cancer (4), cholecystitis (5), cholelithiasis (6) and non-alcoholic fatty liver disease (7). The causal potential of the association for liver disease was further supported by a meta-analysis of 11 randomized controlled trials which found that exercise improved hepatic steatosis and serum alanine aminotransferase levels in patients with non-alcoholic fatty liver disease (8). However, the causality of most of these associations is not fully established due to potential limitations of observational studies, like residual confounding, misclassification, and reverse causation (9). Sedentary behaviors may also influence human health and the risk caused by a sedentary lifestyle cannot be offset by physical activity (10, 11). Nevertheless, few studies have been conducted to explore the associations between sedentary behavior and the risk of gastrointestinal diseases; and the causal associations of sedentary behavior and physical activity with the risk of developing gastrointestinal diseases remain to be elucidated.

Mendelian randomization (MR) is an epidemiological approach that utilizes genetic variants as instrumental variables to strengthen causal inference (12). Genetic variants are randomly assorted at conception and thus are not subject to confounding. Multivariable MR (MVMR) is an approach of reducing potential pleiotropy or exploring mediation effects by calculating estimates conditionally on the pleiotropic trait or the mediator. Here, we conducted an MR investigation to explore the associations of sedentary behavior and physical activity with a wide range of gastrointestinal diseases.

## Methods

We used leisure screen time (LST) as an indicator of sedentary behavior and moderate-to-vigorous intensity physical activity during leisure time (MVPA) for physical activity. The study design is presented in **Figure 1**. The study was based on data from large genome-wide association studies (GWASs) including the UK Biobank study (13), the FinnGen study (14), the Resource for Genetic Epidemiology Research on Aging (GERA) (15), and the International Inflammatory Bowel Disease Genetics Consortium (IIBDGC) (16). Detailed information on used data sources is shown in **Table S1**. MR estimates were generated separately in each outcome dataset and then combined for each gastrointestinal endpoint using meta-analysis. All included GWASs had been approved by corresponding institutional review boards and ethical committees. All participants had signed informed consent.

## **Instrumental variable selection**

Genetic variants for LST (N=606,820) and MVPA (N=526,725) were extracted from a GWAS meta-analysis of 53 studies of European populations (17). The two phenotypes were based on self-reported data from the questionnaires (17). Single nucleotide polymorphisms (SNPs) at the genome-wide significance threshold ( $P < 5 \times 10^{-8}$ ) were identified. These genetic variants were clumped for linkage disequilibrium (defined as  $r^2 > 0.01$ ), leaving 132 SNPs as instrumental variables for LST and 17 SNPs for MVPA. Detailed information on used SNPs is shown in **Table S2**.

## **Gastrointestinal disease data sources**

Genetic associations with 24 gastrointestinal diseases were obtained from the UK Biobank study (18), the FinnGen study (14), and two large consortia, including IIBDGC (16) and GERA (15). The UK Biobank study is a large multicenter cohort study initiated in the United Kingdom between 2006 and 2010 and comprises approximately half a million individuals (18). Summary-level statistics on gastrointestinal outcomes were derived from GWAS summary statistics of European participants from Lee lab (<https://www.leelabsg.org/resources>) wherein endpoints were defined using codes of the International Classification of Diseases 9th Revision (ICD-9) and ICD-10. Genetic associations were adjusted for sex, birth year, and the first four genetic principal components. We also obtained data on the associations between exposure-SNPs and gastrointestinal diseases from the latest FinnGen study R8 release (14). The FinnGen study combines genetic data from nationwide biobanks and disease status from structured national healthcare databases. The gastrointestinal diseases were defined by the ICD codes (ICD-8, ICD-9, and ICD-10). Genetic associations were adjusted for sex, age, genotyping batch, and 10 principal components. ICD codes used to define the outcomes in UK Biobank and FinnGen are presented in **Table S3**. Additionally, summary-level data from the IIBDGC were extracted for Crohn's disease (5,956 cases and 14,927 controls) and ulcerative colitis (6,968 cases and 20,464 controls) (16) and summary-level data from the GERA were extracted for irritable bowel syndrome (3,117 cases and 53,520 controls) (15).

## **Data sources for smoking, alcohol consumption, body mass index, diabetic traits**

The instrumental variables for smoking initiation, cigarettes smoked per day, alcohol consumption, body mass index (BMI), fasting insulin and type 2 diabetes mellitus liability were extracted from the corresponding latest publicly available GWASs, respectively (19-22). Summary-level data on smoking initiation from GWAS and Sequencing Consortium of Alcohol and Nicotine use consortium (GSCAN) were extracted where the phenotype reflected smoking status (19). Genetic associations with cigarettes smoked per day were

obtained from GSCAN which capture the heaviness of smoking (19). Genetic association with alcohol consumption were also derive from GSCAN including 941,280 European-ancestry individuals (19). Genetic associations with BMI were obtained from the largest GWAS which containing up to 694 649 individuals of European ancestry (20). Genetic associations with fasting insulin were obtained from a GWAS with 151,013 European-ancestry individuals (21). Summary-level data on type 2 diabetes liability were selected from a meta-analysis GWAS which including 148,726 cases and 965,732 controls (22). Detailed information on these studies is shown in **Table S1**.

### Statistical analysis

The primary MR estimates were calculated using the inverse-variance weighted (IVW) method under multiplicative random-effects. The IVW method provides the most precise estimate under the assumption that all instruments are valid. Estimates for each outcome from different sources were combined using the fixed-effects meta-analysis method. Cochran's Q value was employed to evaluate the heterogeneity among SNPs' estimates. Three sensitivity analyses were conducted including the weighted median (23), MR-Egger (24), and Mendelian randomization pleiotropy residual sum and outlier (MR-PRESSO) (25) to examine the robustness of the associations and to detect potential horizontal pleiotropy. The weighted median method provides a consistent estimate if > 50% of the weight comes from valid instrumental variables (23). Although MR-Egger regression provides an estimate usually underpowered, the embedded intercept test can detect potential horizontal pleiotropy (24). MR-PRESSO can identify horizontal pleiotropic outliers and provides a corrected estimate after the removal of the outliers (25).

We performed a sensitivity analysis using genetic variants using a lower linkage disequilibrium threshold of  $r^2=0.001$ . In addition, given a strong genetic correlation between LST and MVPA ( $\rho=-0.49$ ), we performed multivariable MR (MVMR) analyses with mutual adjustment to explore the independent effects of LST and MVPA on gastrointestinal diseases. To minimize pleiotropy from smoking and alcohol consumption, we performed MVMR with adjustment for genetic predisposition to smoking and alcohol consumption. MVMR were also conducted with adjustment for genetically predicted BMI and type 2 diabetes to explore the mediation of these factors on the associations of LST and MVPA with the risk of gastrointestinal disease.

Power estimation was performed for each gastrointestinal outcome.  $F$ -statistic was calculated for each SNP and an  $F$ -statistic > 10 indicated a reliable instrument variable. The conditional  $F$ -statistic was calculated to characterize instrument strengths in MVMR (Table S5). However, the power analysis and  $F$ -statistic were not available for MVPA due to its binary phenotype. Odds ratios (ORs) and confidence intervals (CIs) of gastrointestinal

diseases were scaled to a one-SD increase in hours/day of genetically predicted LST and a one-unit increase in log odds of genetic liability to MVPA (17). The Benjamini-Hochberg method that controls the false discovery rate (FDR) was applied to correct for multiple testing. The association with a Benjamini–Hochberg adjusted  $P$  value  $<0.05$  were deemed statistically significant. All analyses were two-sided and performed using the TwoSampleMR (26), MendelianRandomization (23), and MRPRESSO (25) R packages in R software 4.2.2.

## Results

There was no indication of weak instruments for LST ( $F$ -statistic for each genetic variant was above 10) (**Table S2**). However, not all the conditional  $F$ -statistics of instruments were more than 10 in MVMR (**Table S4**). Power calculations showed that there was 80% power to detect the OR ranging from 1.13 to 1.94 for each outcome (**Table S5**).

### LST and gastrointestinal disease

After multiple comparison corrections, genetically predicted longer LST was associated with an increased risk of 14 of 24 gastrointestinal diseases including gastrointestinal reflux, gastric ulcer, duodenal ulcer, chronic gastritis, irritable bowel syndrome, diverticular disease, Crohn's disease, non-alcoholic fatty liver disease, alcoholic liver disease, cholecystitis, cholelithiasis, acute pancreatitis, chronic pancreatitis, and acute appendicitis (**Figure 2 and Table S6**). The ORs per 1-SD increase in genetically predicted LST ranged from 1.11 (95% CI 1.02, 1.20) for acute appendicitis to 1.62 (95% CI 1.32, 1.99) for non-alcoholic fatty liver disease. Heterogeneity in SNP estimates was detected in the analysis for gastroesophageal reflux, gastric ulcer, chronic gastritis, non-alcoholic fatty liver disease, cholelithiasis, chronic pancreatitis, and acute appendicitis in FinnGen. The associations were directionally consistent in sensitivity analyses (**Table S7**). The MR-Egger intercept test detected potential horizontal pleiotropy in the analysis for gastroesophageal reflux in FinnGen ( $P$  for intercept  $<0.05$ ). However, this association persisted in MR-PRESSO analysis after the removal of an outlier (**Table S7**). MR-PRESSO also detected 1-2 outliers in the analyses for gastric ulcer and cholelithiasis; however, these associations remained after removing the outliers (**Table S7**). The associations remained in the sensitivity analysis using a stringent threshold of linkage (**Table S8**). In MVMR adjustment for genetic liability to MVPA, genetically predicted LST was associated with gastroesophageal reflux, gastric ulcer, duodenal ulcer, irritable bowel syndrome, diverticular disease, non-alcoholic fatty liver disease, cholecystitis, cholelithiasis, acute pancreatitis, chronic pancreatitis, and acute appendicitis ( $P < 0.05$ ) although slightly attenuated (**Figure 2 and Table S9**).

### MVPA and gastrointestinal diseases

Genetic predisposition to MVPA was associated with a decreased risk of 6 gastrointestinal

diseases including gastroesophageal reflux, gastric ulcer, chronic gastritis, irritable bowel syndrome, cholelithiasis, and acute pancreatitis after correcting for multiple testing (**Figure 3 and Table S6**). The ORs of genetically predicted MVPA ranged from 0.49 (95% CI 0.34, 0.71) for acute pancreatitis to 0.72 (95% 0.59, 0.88) for gastroesophageal reflux. There is heterogeneity in SNP estimates for the analysis of gastroesophageal reflux in the UK Biobank (**Table S10**). Estimates across sensitivity analyses were directionally consistent. The MR-Egger intercept test did not detect any indication of pleiotropy. One outlier was identified for gastroesophageal reflux in UK Biobank. The associations persisted after the removal of the outlier (**Table S10**). With a strict linkage disequilibrium threshold, genetically predicted MVPA was still associated with these 6 identified gastrointestinal diseases (**Table S8**). After adjustment for genetically proxied LST, although estimates were not substantially altered, the associations of genetically predicted MVPA with gastric ulcer and chronic gastritis were no longer statistically significant (**Table S9**).

### **Pleitropic effects of smoking and alcohol consumption**

When adjusting for genetically proxied smoking initiation, genetically predicted longer LST was associated with 13 of 24 gastrointestinal diseases except for alcoholic liver disease even though the estimates were modestly attenuated (**Table S11**). Similar results were obtained after adjustment for genetically proxied cigarettes smoked per day (**Table S11**). With adjustment for genetically predicted alcohol consumption, genetically predicted longer LST was still associate with 13 identified gastrointestinal diseases (**Table S11**). After adjusting for genetically proxied smoking initiation, the associations of genetic predisposition to MVPA with gastroesophageal reflux, irritable bowel syndrome, and cholelithiasis remained (**Table S11**). The associations for five gastrointestinal diseases remained significant after adjustment for genetically proxied cigarette smoked per day except for that for chronic gastritis (**Table S11**). Similar findings were observed after adjustment for genetically predicted alcohol consumption (**Table S11**).

### **Mediation analysis**

The mediation of BMI, fasting insulin, and type 2 diabetes in the associations between LST and 14 identified gastrointestinal diseases is shown in **Table 1 and Table S12**. The proportion of BMI-mediation effect ranged from -1.4% for chronic pancreatitis to 45.6% for cholelithiasis (**Table 1**). The mediation effect of fasting insulin and type 2 diabetes was less pronounced than that of BMI. The proportion of the mediation effect of fasting insulin ranged from -1.3% for Crohn's disease to 15.7% for non-alcoholic fatty liver disease, and the proportion of mediation effect of type 2 diabetes ranged from -1.2% for Crohn's disease to 18.4% for non-alcoholic fatty liver disease (**Table 1**).

The results of the mediation analysis of BMI, fasting insulin, and type 2 diabetes in association between MVPA and gastrointestinal diseases are shown in **Table 2 and Table S12**. BMI mediated around 39.1% of the effect of MVPA on cholelithiasis (**Table 2**). Fasting insulin mediated 2.7%-10.3% effect of MVPA on 6 gastrointestinal diseases. The mediation effect of type 2 diabetes ranged from 3.78% for gastroesophageal reflux to 18.1% for chronic gastritis (**Table 2**).

## Discussion

This study comprehensively investigated the causal associations of LST and MVPA with the risk of 24 gastrointestinal diseases using MR analysis. Genetically proxied longer LST was associated with an increased risk of 14 gastrointestinal diseases. Genetic liability to MVPA was inversely associated with 6 gastrointestinal diseases. The associations for LST remained overall stable after adjustment for genetic liability to MVPA and vice versa. However, some associations attenuated after adjustment for genetically proxied smoking behaviors, which indicates the pleiotropic effects of smoking in this analysis. Multivariable MR analysis also found that genetically proxied BMI, fasting insulin levels, and type 2 diabetes partially mediated the associations of LST and MVPA with several gastrointestinal diseases.

The current MR found evidence that genetically predicted LST and MVPA were associated with several upper and lower gastrointestinal diseases. Previous observational studies suggested that high levels of physical activity were associated with a low risk of gastroesophageal disease (2, 27), gastric ulcer (28), duodenal ulcer (29), diverticular disease (30, 31) and that lack of habitual physical exercise was associated with a higher risk of gastroesophageal reflux (27). Our MR study supported these findings and further corroborated the causality of these associations.

We also provided evidence that genetically predicted LST was positively associated with some hepatobiliary and pancreatic outcomes including non-alcoholic fatty liver disease, alcoholic liver disease, cholecystitis, cholelithiasis, pancreatitis, and acute appendicitis. Genetically predicted MVPA was inversely associated with cholecystitis, cholelithiasis, and acute pancreatitis. A prospective cohort study including 360,047 participants showed that longer sedentary time was associated with a higher risk of chronic liver disease and replacing 1 h/day sedentary time with equivalent physical activity was associated with a lower risk of chronic liver disease (30), which was in line with our findings. Based on findings from the Nurses' Health Study, sedentary behavior was independently associated with an increased risk of cholecystectomy (32). Extending the previous observational findings, our MR investigation strengthened the evidence that physical activity was associated with a low risk of cholecystitis (5) and cholelithiasis (6). Our MR investigation also confirmed results



from previous MR studies where genetically predicted longer television watching time was associated with higher levels of hepatic fat (33). Another MR study demonstrated that genetically predicted vigorous physical activity was associated with a decreased risk of non-alcoholic fatty liver disease (34). Our findings also provide novel evidence on the associations of LST and MVPA with acute appendicitis which need to be verified.

We did not observe positive associations of genetically predicted LST or MVPA with colorectal cancer or esophageal cancer, which was identified in previous observational studies (35, 36). Besides, a previous MR analysis comprising 31,197 colorectal cases found that genetically predicted MVPA was associated with a decreased risk of colorectal cancer (37). This discrepancy is likely caused by a relatively small sample size of these cancers in our MR analysis.

Our results also provided information that genetically predicted longer LST was positively associated with the risk of several gastrointestinal diseases independent of MVPA and vice versa. These findings suggest that reducing sedentary time and increasing physical activity were both important for gastrointestinal disease prevention. Besides, after mutually adjusting for LST and MVPA, the association for chronic gastritis became null which could be explained by the similar constructs picked by LST and MVPA. Thus, the insignificant associations after mutual adjustment did not necessarily mean that either LST or MVPA was not a risk factor for chronic gastritis. In MVMR adjusting for smoking initiation and cigarettes smoked per day, some identified associations attenuated which indicated the potential horizontal pleiotropy introduced by smoking behaviors. Of note, we observed that BMI, fasting insulin, and type 2 diabetes seemed to partly mediate the associations of LST and MVPA with gastrointestinal diseases, which indicates that metabolic factors may involve in the pathological process. In addition, given that a comparative proportion of the effect was mediated by type 2 diabetes, our results support the current guidelines that recommend increasing activity and decreasing sedentary behavior among type 2 diabetes patients from the American Diabetes Association to improve their overall well-being (38). Similarly, more physical exercise and less sedentary time should also be recommended among obese individuals as a part of the management of gastrointestinal health due to the mediation effects of BMI observed in the link from physical activity and sedentary lifestyle to gastrointestinal disease in this study.

Mechanisms linking sedentary behavior and physical activity with the gastrointestinal disease are not completely understood. Apart from being overweight, animal experiments have suggested that prolonged sitting might disturb lipid metabolism and result in the reduction of lipoprotein lipase activity which then raises the possibility of impaired metabolic actions (39, 40). Besides, there was evidence that sedentary behavior might lead to increased systemic chronic inflammation, which may also increase the risk of developing

gastrointestinal diseases (41). In addition, high levels of physical activity and a shorter sedentary time have been associated with lower insulin levels (42), which have been indicated to play a role in the development of many gastrointestinal diseases (43-45). The diversity, composition, and functionality of gut microbiota can be modified by physical exercise possibly via intestinal barrier preservation and bile acid homeostasis improvement (46). In addition, standing up benefits physiological processes including postural blood flow, energy expenditure, and muscle contraction, which may promote glucose regulation, mitochondrial function, and endothelial function (47). This may explain why adjustment for MVPA barely affected the positive association between LST and several gastrointestinal diseases.

Compared to physical activity, sedentary behaviors in relation to gastrointestinal diseases were less been investigated. Our findings on LST are potentially relevant to interventions and guidance aimed at reducing gastrointestinal diseases through behavioral intervention. Besides, LST has increased by approximately 1 hour for young children and 0.7 hours for adults during the COVID-19 pandemic (48), which may exacerbate these harms. According to our findings, emphasizing and adopting multilevel measures are critical to preventing unhealthy screen time.

The major strength of the present study is the MR design, which minimized bias from confounding and reverse causality and thus improved the causal inference in the associations of LST and MVPA with gastrointestinal diseases. We also used several independent outcome sources and combined the estimates, which increased statistical power as well as strengthened our findings by the observed consistency of results. Another strength is that we confined our analysis to individuals of European ancestry, which minimized the population stratification bias. This study also has several limitations.

A major limitation of the current MR study was horizontal pleiotropy, which could affect the validity of our MR findings. However, we conducted a series of sensitivity analyses including adjustment for two smoking behaviors, and the consistent results indicated limited pleiotropy. Another limitation is the relatively limited sample size in several gastrointestinal diseases, which means this study might have had inadequate power to detect weak associations between the exposure and diseases. A relatively small number of instruments is available for MVPA which may result in inadequate statistical power and underestimating the impact of MVPA on gastrointestinal diseases. Besides, our study participants were of European ancestry, and thus the observed associations may not be directly generalizable to other populations. A further potential limitation is that individuals of the UK Biobank were included in both the exposure and outcome datasets, which might introduce some bias in the causal estimates in the direction of the estimates of observational studies. However, we employed non-overlapping datasets (e.g., the FinnGen study) and the consistent results indicated that

the bias due to sample overlap is reasonably small. The conditional F-statistics in MVMR indicated possible weak instrument bias. However, the small sample overlap minimized the possibility of this bias. Finally, the LST and MVPA were self-reported which could be biased by recall and awareness of the beneficial effects of physical activity.

In conclusion, this MR investigation found that genetically proxied longer LST was associated with an increased risk of 14 gastrointestinal diseases, whereas genetic liability to MVPA is associated with a decreased risk of 6 gastrointestinal diseases. Considering that physical activity and sedentary behavior are inversely correlated, our findings support the independent benefits of reducing sedentary time and promoting physical activity in gastrointestinal disease prevention. Future studies are encouraged to explore the joint effect of LST and MVPA on gastrointestinal health.

## Statements

### Contributorship

All authors read and approved the final manuscript and author contributions statement using CRediT with the degree of contribution:

Jie Chen (Conceptualization: Equal; Methodology: Equal; Formal analysis: Equal; Data curation: Equal; and Writing - review & editing: Equal)

Xixian Ruan (Conceptualization: Equal; Methodology: Equal; Formal analysis: Equal; Data curation: Equal; and Writing – original draft: Equal)

Tian Fu (Conceptualization: Equal; Methodology: Equal; Formal analysis: Equal; Data curation: Equal; and Writing – original draft: Equal)

Shiyuan Lu (Conceptualization: Supporting; Writing - review & editing: Supporting)

Dipender Gill (Conceptualization: Supporting; Methodology: Supporting; Writing - review & editing: Equal)

Zixuan He (Conceptualization: Supporting; Writing - review & editing: Supporting)

Stephen Burgess (Conceptualization: Supporting; Methodology: Supporting; Writing - review & editing: Equal)

Edward L Giovannucci (Conceptualization: Supporting; Methodology: Supporting; Writing - review & editing: Equal)

Susanna C. Larsson (Conceptualization: Equal; Methodology: Equal; Data curation: Equal; and Writing - review & editing: Leading)

Minzi Deng (Conceptualization: Equal; Data curation: Equal; and Funding acquisition: Equal; Writing - review & editing: Equal)

Shuai Yuan (Conceptualization: Leading; Data curation: Equal; Writing - review & editing: Leading)

Xue Li (Conceptualization: Equal; Data curation: Equal; Funding acquisition: Leading; and Writing - review & editing: Leading)

### Competing Interests

All authors declare no competing interest.

### Funding

XL is supported by the Natural Science Fund for Distinguished Young Scholars of Zhejiang Province (LR22H260001). MZD is supported by Natural Science Foundation of Hunan Province (2021JJ30999); SCL is supported by the Swedish Heart Lung Foundation (Hjärt-Lungfonden, 20210351), the Swedish Research Council (Vetenskapsrådet, 2019-00977), and the Swedish Cancer Society (Cancerfonden). SB is supported by the Wellcome Trust (225790/7/22/Z) and the United Kingdom Research and Innovation Medical Research Council (MC\_UU\_00002/7). This research was supported by the National

Institute for Health Research Cambridge Biomedical Research Centre (NHIR203312). The views expressed are those of the authors and not necessarily those of the National Institute for Health Research or the Department of Health and Social Care. Funders had no role in the design and conduct of the study; collection, management, analysis, and interpretation of the data; preparation, review, or approval of the manuscript; or the decision to submit the manuscript for publication.

### **Data Sharing**

Data can be obtained upon a reasonable request to corresponding authors.

## Reference

1. Guthold R, Stevens GA, Riley LM, Bull FC. Worldwide trends in insufficient physical activity from 2001 to 2016: a pooled analysis of 358 population-based surveys with 1.9 million participants. *Lancet Glob Health*. 2018;6(10):e1077-e86.
2. Nocon M, Labenz J, Willich SN. Lifestyle factors and symptoms of gastro-oesophageal reflux -- a population-based study. *Aliment Pharmacol Ther*. 2006;23(1):169-74.
3. Moore SC, Lee IM, Weiderpass E, Campbell PT, Sampson JN, Kitahara CM, et al. Association of Leisure-Time Physical Activity With Risk of 26 Types of Cancer in 1.44 Million Adults. *JAMA Intern Med*. 2016;176(6):816-25.
4. Larsson SC, Rutegard J, Bergkvist L, Wolk A. Physical activity, obesity, and risk of colon and rectal cancer in a cohort of Swedish men. *Eur J Cancer*. 2006;42(15):2590-7.
5. Williams PT. Independent effects of cardiorespiratory fitness, vigorous physical activity, and body mass index on clinical gallbladder disease risk. *Am J Gastroenterol*. 2008;103(9):2239-47.
6. Kriska AM, Brach JS, Jarvis BJ, Everhart JE, Fabio A, Richardson CR, et al. Physical activity and gallbladder disease determined by ultrasonography. *Med Sci Sports Exerc*. 2007;39(11):1927-32.
7. Vilar-Gomez E, Nephew LD, Vuppalanchi R, Gawrieh S, Mladenovic A, Pike F, et al. High-quality diet, physical activity, and college education are associated with low risk of NAFLD among the US population. *Hepatology*. 2022;75(6):1491-506.
8. Nam H, Yoo JJ, Cho Y, Kang SH, Ahn SB, Lee HW, et al. Effect of exercise-based interventions in nonalcoholic fatty liver disease: A systematic review with meta-analysis. *Dig Liver Dis*. 2023.
9. Bauman AE, Reis RS, Sallis JF, Wells JC, Loos RJ, Martin BW, et al. Correlates of physical activity: why are some people physically active and others not? *Lancet*. 2012;380(9838):258-71.
10. Santos R, Mota J, Okely AD, Pratt M, Moreira C, Coelho-e-Silva MJ, et al. The independent associations

of sedentary behaviour and physical activity on cardiorespiratory fitness. *Br J Sports Med.* 2014;48(20):1508-12.

11. Knaeps S, Bourgois JG, Charlier R, Mertens E, Lefevre J, Wijndaele K. Ten-year change in sedentary behaviour, moderate-to-vigorous physical activity, cardiorespiratory fitness and cardiometabolic risk: independent associations and mediation analysis. *Br J Sports Med.* 2018;52(16):1063-8.

12. Davey Smith G, Hemani G. Mendelian randomization: genetic anchors for causal inference in epidemiological studies. *Hum Mol Genet.* 2014;23(R1):R89-98.

13. Zhou W, Zhao Z, Nielsen JB, Fritsche LG, LeFaive J, Gagliano Taliun SA, et al. Scalable generalized linear mixed model for region-based association tests in large biobanks and cohorts. *Nat Genet.* 2020;52(6):634-9.

14. Kurki MI, Karjalainen J, Palta P, Sipilä TP, Kristiansson K, Donner K, et al. FinnGen: Unique genetic insights from combining isolated population and national health register data. *medRxiv.* 2022:2022.03.03.22271360.

15. Guindo-Martinez M, Amela R, Bonas-Guarch S, Puiggros M, Salvoró C, Miguel-Escalada I, et al. The impact of non-additive genetic associations on age-related complex diseases. *Nat Commun.* 2021;12(1):2436.

16. Liu JZ, van Sommeren S, Huang H, Ng SC, Alberts R, Takahashi A, et al. Association analyses identify 38 susceptibility loci for inflammatory bowel disease and highlight shared genetic risk across populations. *Nat Genet.* 2015;47(9):979-86.

17. Wang Z, Emmerich A, Pillon NJ, Moore T, Hemerich D, Cornelis MC, et al. Genome-wide association analyses of physical activity and sedentary behavior provide insights into underlying mechanisms and roles in disease prevention. *Nat Genet.* 2022;54(9):1332-44.

18. Sudlow C, Gallacher J, Allen N, Beral V, Burton P, Danesh J, et al. UK biobank: an open access resource

for identifying the causes of a wide range of complex diseases of middle and old age. *PLoS Med.* 2015;12(3):e1001779.

19. Liu M, Jiang Y, Wedow R, Li Y, Brazel DM, Chen F, et al. Association studies of up to 1.2 million individuals yield new insights into the genetic etiology of tobacco and alcohol use. *Nat Genet.* 2019;51(2):237-44.

20. Pulit SL, Stoneman C, Morris AP, Wood AR, Glastonbury CA, Tyrrell J, et al. Meta-analysis of genome-wide association studies for body fat distribution in 694 649 individuals of European ancestry. *Hum Mol Genet.* 2019;28(1):166-74.

21. Chen J, Spracklen CN, Marenne G, Varshney A, Corbin LJ, Luan J, et al. The trans-ancestral genomic architecture of glycemic traits. *Nat Genet.* 2021;53(6):840-60.

22. Vujkovic M, Keaton JM, Lynch JA, Miller DR, Zhou J, Tcheandjieu C, et al. Discovery of 318 new risk loci for type 2 diabetes and related vascular outcomes among 1.4 million participants in a multi-ancestry meta-analysis. *Nat Genet.* 2020;52(7):680-91.

23. Yavorska OO, Burgess S. MendelianRandomization: an R package for performing Mendelian randomization analyses using summarized data. *Int J Epidemiol.* 2017;46(6):1734-9.

24. Burgess S, Thompson SG. Interpreting findings from Mendelian randomization using the MR-Egger method. *Eur J Epidemiol.* 2017;32(5):377-89.

25. Verbanck M, Chen CY, Neale B, Do R. Detection of widespread horizontal pleiotropy in causal relationships inferred from Mendelian randomization between complex traits and diseases. *Nat Genet.* 2018;50(5):693-8.

26. Hemani G, Zheng J, Elsworth B, Wade KH, Haberland V, Baird D, et al. The MR-Base platform supports systematic causal inference across the human phenome. *Elife.* 2018;7.



27. Nilsson M, Johnsen R, Ye W, Hveem K, Lagergren J. Lifestyle related risk factors in the aetiology of gastro-oesophageal reflux. *Gut*. 2004;53(12):1730-5.
28. Rosenstock S, Jorgensen T, Bonnevie O, Andersen L. Risk factors for peptic ulcer disease: a population based prospective cohort study comprising 2416 Danish adults. *Gut*. 2003;52(2):186-93.
29. Cheng Y, Macera CA, Davis DR, Blair SN. Does physical activity reduce the risk of developing peptic ulcers? *Br J Sports Med*. 2000;34(2):116-21.
30. Cao Z, Xu C, Zhang P, Wang Y. Associations of sedentary time and physical activity with adverse health conditions: Outcome-wide analyses using isotemporal substitution model. *EClinicalMedicine*. 2022;48:101424.
31. Aune D, Sen A, Leitzmann MF, Norat T, Tonstad S, Vatten LJ. Body mass index and physical activity and the risk of diverticular disease: a systematic review and meta-analysis of prospective studies. *Eur J Nutr*. 2017;56(8):2423-38.
32. Leitzmann MF, Rimm EB, Willett WC, Spiegelman D, Grodstein F, Stampfer MJ, et al. Recreational physical activity and the risk of cholecystectomy in women. *N Engl J Med*. 1999;341(11):777-84.
33. Yuan S, Chen J, Vujkovic M, Chang K-M, Li X, Larsson SC, et al. Effects of metabolic traits, lifestyle factors, and pharmacological interventions on liver fat: mendelian randomisation study. *BMJ Medicine*. 2022;1(1).
34. Yuan S, Chen J, Li X, Fan R, Arsenault B, Gill D, et al. Lifestyle and metabolic factors for nonalcoholic fatty liver disease: Mendelian randomization study. *Eur J Epidemiol*. 2022;37(7):723-33.
35. Hemelink R, Leitzmann MF, Markozannes G, Tsilidis K, Pukrop T, Berger F, et al. Sedentary behavior and cancer-an umbrella review and meta-analysis. *Eur J Epidemiol*. 2022;37(5):447-60.
36. Hunter RF, Murray JM, Coleman HG. The association between recreational screen time and cancer risk: findings from the UK Biobank, a large prospective cohort study. *Int J Behav Nutr Phys Act*. 2020;17(1):97.

37. Zhang X, Theodoratou E, Li X, Farrington SM, Law PJ, Broderick P, et al. Genetically predicted physical activity levels are associated with lower colorectal cancer risk: a Mendelian randomisation study. *Br J Cancer*. 2021;124(7):1330-8.
38. ElSayed NA, Aleppo G, Aroda VR, Bannuru RR, Brown FM, Bruemmer D, et al. 5. Facilitating Positive Health Behaviors and Well-being to Improve Health Outcomes: Standards of Care in Diabetes—2023. *Diabetes Care*. 2022;46(Supplement\_1):S68-S96.
39. Zderic TW, Hamilton MT. Physical inactivity amplifies the sensitivity of skeletal muscle to the lipid-induced downregulation of lipoprotein lipase activity. *J Appl Physiol (1985)*. 2006;100(1):249-57.
40. Hamilton MT, Hamilton DG, Zderic TW. Role of low energy expenditure and sitting in obesity, metabolic syndrome, type 2 diabetes, and cardiovascular disease. *Diabetes*. 2007;56(11):2655-67.
41. Henson J, Yates T, Edwardson CL, Khunti K, Talbot D, Gray LJ, et al. Sedentary time and markers of chronic low-grade inflammation in a high risk population. *PLoS One*. 2013;8(10):e78350.
42. Helmerhorst HJ, Wijndaele K, Brage S, Wareham NJ, Ekelund U. Objectively measured sedentary time may predict insulin resistance independent of moderate- and vigorous-intensity physical activity. *Diabetes*. 2009;58(8):1776-9.
43. Rubenstein JH, Morgenstern H, McConell D, Scheiman JM, Schoenfeld P, Appelman H, et al. Associations of diabetes mellitus, insulin, leptin, and ghrelin with gastroesophageal reflux and Barrett's esophagus. *Gastroenterology*. 2013;145(6):1237-44 e1-5.
44. Watanabe S, Hojo M, Nagahara A. Metabolic syndrome and gastrointestinal diseases. *J Gastroenterol*. 2007;42(4):267-74.
45. Chen J, Yuan S, Fu T, Ruan X, Qiao J, Wang X, et al. Gastrointestinal Consequences of Type 2 Diabetes Mellitus and Impaired Glycemic Homeostasis: A Mendelian Randomization Study. *Diabetes Care*. 2023.

46. Carbajo-Pescador S, Porras D, Garcia-Mediavilla MV, Martinez-Florez S, Juarez-Fernandez M, Cuevas MJ, et al. Beneficial effects of exercise on gut microbiota functionality and barrier integrity, and gut-liver crosstalk in an in vivo model of early obesity and non-alcoholic fatty liver disease. *Dis Model Mech*. 2019;12(5).
47. Thosar SS, Johnson BD, Johnston JD, Wallace JP. Sitting and endothelial dysfunction: the role of shear stress. *Med Sci Monit*. 2012;18(12):RA173-80.
48. Trott M, Driscoll R, Irlado E, Pardhan S. Changes and correlates of screen time in adults and children during the COVID-19 pandemic: A systematic review and meta-analysis. *EClinicalMedicine*. 2022;48:101452.

Table 1. Proportion of mediation effect in association between leisure screen time and 14 gastrointestinal disease via each mediator

| Disease/Mediator                  | Body mass index | Fasting insulin | Type 2 diabetes |
|-----------------------------------|-----------------|-----------------|-----------------|
| Gastroesophageal reflux           | 13.33%          | 4.23%           | 4.09%           |
| Gastric ulcer                     | 10.80%          | 9.05%           | 8.42%           |
| Duodenal ulcer                    | 13.70%          | 7.85%           | 9.27%           |
| Chronic gastritis                 | 3.99%           | 11.98%          | 13.18%          |
| Irritable bowel disease           | -2.17%          | 4.28%           | 4.66%           |
| Diverticular disease              | 14.73%          | 3.29%           | 4.18%           |
| Crohn's disease                   | 11.19%          | -1.28%          | -1.20%          |
| Non-alcoholic fatty liver disease | 32.52%          | 15.68%          | 18.41%          |
| Alcoholic liver disease           | 11.20%          | 6.63%           | 5.38%           |
| Cholecystitis                     | 37.52%          | 8.14%           | 7.66%           |
| Cholelithiasis                    | 45.63%          | 8.92%           | 9.01%           |
| Acute pancreatitis                | 12.78%          | 3.42%           | 3.65%           |
| Chronic pancreatitis              | -1.43%          | 4.64%           | 5.36%           |
| Acute appendicitis                | 27.41%          | 2.13%           | 1.74%           |

Table 2. Proportion of mediation effect in association between moderate-to-vigorous intensity physical activity and 15 gastrointestinal disease via each mediator

| Disease/Mediator        | Body mass index | Fasting insulin | Type 2 diabetes |
|-------------------------|-----------------|-----------------|-----------------|
| Gastroesophageal reflux | 7.40%           | 4.26%           | 3.78%           |
| Gastric ulcer           | 3.59%           | 5.78%           | 5.79%           |
| Chronic gastritis       | 2.79%           | 10.33%          | 18.11%          |
| Irritable bowel disease | 1.80%           | 2.72%           | 3.90%           |
| Cholelithias            | 39.13%          | 6.84%           | 10.89%          |
| Acute pancreatitis      | 11.11%          | 3.91%           | 6.44%           |

## Figure legend

**Figure 1. Study design.** MVPA, moderate-to-vigorous intensity physical activity during leisure time; MR, Mendelian randomization; GERA Resource for Genetic Epidemiology Research on Aging; IIBDGC, the International Inflammatory Bowel Disease Genetics Consortium; MR-PRESSO, Mendelian randomization pleiotropy residual sum, and outlier.

**Figure 2. Associations of genetically predicted leisure screen time with 24 gastrointestinal diseases in univariable Mendelian randomization and multivariable Mendelian randomization (adjustment for moderate-to-vigorous intensity physical activity).**

\* Significant association after multiple testing.

The estimate of irritable bowel syndrome was meta-analyzed by combining estimates from the UK Biobank study, the FinnGen study, and the Genetic Epidemiology Research on Aging consortium; the estimates of Crohn's disease and ulcerative colitis were meta-analyzed by combining estimates from the UK Biobank study, the FinnGen study and the International Inflammatory Bowel Disease Genetics Consortium; the estimates of other gastrointestinal disease were meta-analysis by combining estimates from the UK Biobank study and the FinnGen study. ORs for gastrointestinal diseases were scaled to genetically predicted one standard deviation increase in hours/day of leisure screen time.

**Figure 3. Associations of genetically predicted moderate-to-vigorous intensity physical activity with 24 gastrointestinal diseases in univariable Mendelian randomization and multivariable Mendelian randomization (adjustment for leisure screen time).**

\* Significant association after multiple testing.

The estimate of irritable bowel syndrome was meta-analyzed by combining estimates from the UK Biobank study, the FinnGen study, and the Genetic Epidemiology Research on Aging consortium; the estimates of Crohn's disease and ulcerative colitis were meta-analyzed by combining estimates from the UK Biobank study, the FinnGen study and the International Inflammatory Bowel Disease Genetics Consortium; the estimates of other gastrointestinal disease were meta-analysis by combining estimates from the UK Biobank study and the FinnGen study. ORs for gastrointestinal diseases were scaled to genetically predicted one unit increase in log odds of moderate-to-vigorous intensity physical activity.
